# Supplementary material for: A rule-based algorithm for automatic bond type perception
Source: Springer Nature journal article supplement (doi:10.1186/1758-2946-4-26), 2012-10-31
Supplement: 13321_2012_364_MOESM4_ESM.pdf [file 13321_2012_364_MOESM4_ESM.pdf]

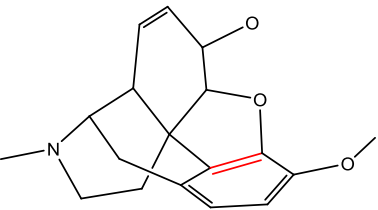

(a)

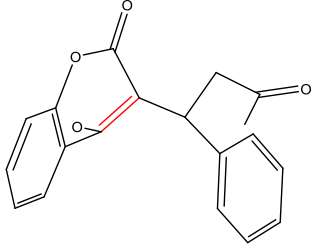

(b)

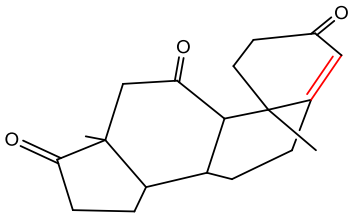

(c)

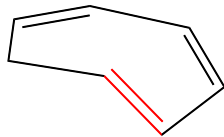

(d)
